# Supplementary material
Source: Springer Nature journal article supplement (https://www.springermedizin.de/resource/supplementary/13075_2010_3038_MOESM5_ESM.pdf/9693394)
Supplement: MOESM5 [file 9693394]

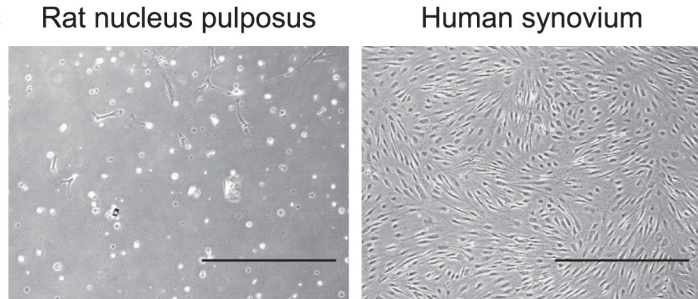

Co-culture with  
human synovial cells and  
rat nucleus pulposus cells

1 day

7 days

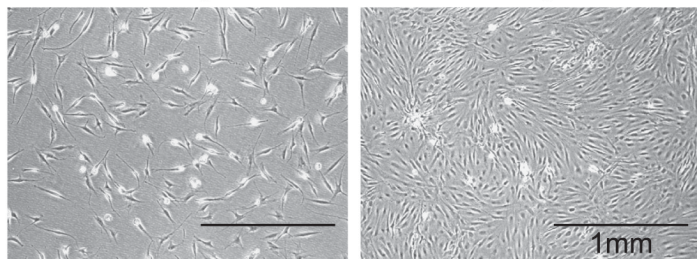

**B** Human genes

**C** Rat genes

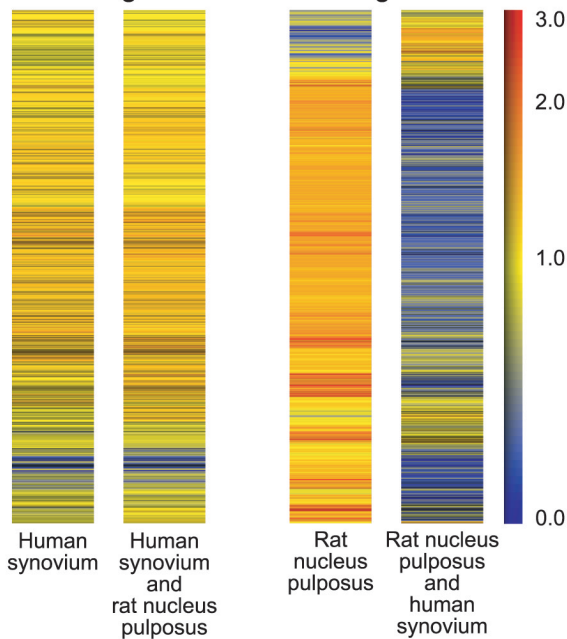

**D** Up-regulated gene number

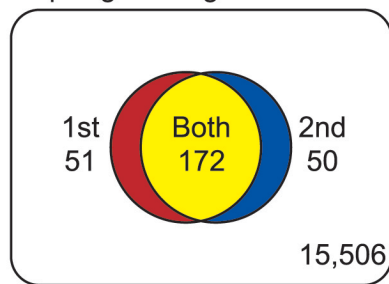

Total 15,779 genes

Down-regulated gene number

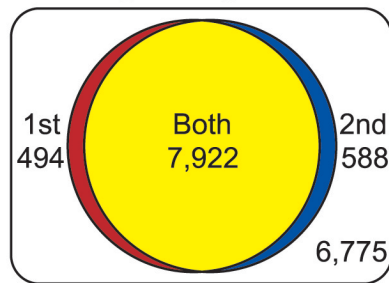

Total 15,779 genes
